# Supplementary material for: Prognostic Relevance of Methylenetetrahydrofolate Reductase Polymorphisms for Prostate Cancer
Source: PubMed Central journal article supplement (PMC5187796; doi:10.3390/ijms17121996), 2016-11-29
Supplement: ijms-17-01996-s001.pdf [file ijms-17-01996-s001.pdf]

# Supplementary Materials: Prognostic Relevance of Metylenetetrahydrofolate Reductase Polymorphisms for Prostate Cancer

Victor C. Lin, Te-Ling Lu, Hsin-Ling Yin, Sheau-Fang Yang, Yung-Chin Lee, Chia-Chu Liu, Chao-Yuan Huang, Chia-Cheng Yu, Ta-Yuan Chang, Shu-Pin Huang and Bo-Ying Bao

**Table S1.** Clinical characteristics of study cohort.

| Characteristic                                          | <i>n</i> (%)    | <i>p</i> <sup>a</sup> |
|---------------------------------------------------------|-----------------|-----------------------|
| Patients, <i>n</i>                                      | 458             |                       |
| Age at diagnosis                                        |                 | 0.517                 |
| Median, <i>y</i> (IQR)                                  | 66 (61–70)      |                       |
| ≤66                                                     | 241 (52.6)      |                       |
| >66                                                     | 217 (47.4)      |                       |
| PSA at diagnosis                                        |                 | <0.001                |
| Median, ng/mL (IQR)                                     | 11.1 (7.1–17.5) |                       |
| ≤10                                                     | 197 (44.9)      |                       |
| >10                                                     | 242 (55.1)      |                       |
| Pathologic Gleason score, <i>n</i> (%)                  |                 | <0.001                |
| ≤6                                                      | 160 (35.3)      |                       |
| >6                                                      | 293 (64.7)      |                       |
| Pathologic stage, <i>n</i> (%)                          |                 | <0.001                |
| T1/T2                                                   | 303 (67.2)      |                       |
| T3/T4/N1                                                | 148 (32.8)      |                       |
| Surgical margin, <i>n</i> (%)                           |                 | <0.001                |
| Negative                                                | 241 (72.6)      |                       |
| Positive                                                | 91 (27.4)       |                       |
| Lymph node metastasis, <i>n</i> (%)                     |                 | <0.001                |
| Negative                                                | 433 (95.6)      |                       |
| Positive                                                | 20 (4.4)        |                       |
| Recurrence                                              | 184 (40.2)      |                       |
| Median follow-up time <sup>b</sup> , <i>mo</i> (95% CI) | 54 (50–58)      |                       |

Abbreviations: *n*, number; *p*, *p* value; *y*, year; IQR, interquartile range; PSA, prostate-specific antigen; T, primary tumor; N, regional lymph nodes; *mo*, month; CI, confidence interval. <sup>a</sup> *p*-value was calculated by the log-rank test for recurrence; <sup>b</sup> Median follow-up time and 95% CIs were estimated with the reverse Kaplan-Meier method.

**Table S2.** Regulatory annotation of *MTHFR* rs9651118.

| Chr | Pos      | Allele | AFR Freq | AMR Freq | ASN Freq | EUR Freq | Variant Type | Promoter Histone Marks                                                                                     | Enhancer Histone Marks                                            | DNase    | Motifs Changed                 | Selected eQTL Hits |
|-----|----------|--------|----------|----------|----------|----------|--------------|------------------------------------------------------------------------------------------------------------|-------------------------------------------------------------------|----------|--------------------------------|--------------------|
| 1   | 11802157 | T/C    | 0.01     | 0.19     | 0.39     | 0.22     | Intronic     | ESC, ESDR, LNG, IPSC, FAT, STRM, BLD, MUS, SKIN, LIV, BRN, GI, ADRL, HRT, KID, OVRY, CRVX, BRST, VAS, BONE | ESDR, IPSC, ESC, BRST, BLD, BRN, PANC, THYM, GI, PLCNT, SPLN, LIV | HRT, BLD | Cdx2, Foxa, Foxd1, HDAC2, p300 | 5 hits             |

Abbreviations: Chr, chromosome; Pos, position; AFR, African; AMR, American; ASN, Asian; EUR, European; DNase, DNase hypersensitivity; eQTL, expression quantitative trait loci.
